# Supplementary material
Source: Research Square preprint supplement (doi:10.21203/rs.3.rs-9181995/v2)
Supplement: Supplementary file 1 [file 322ad8ef9ad935b2b02f4e1e.xlsx]

## Sheet: Sheet 1 - Cuestionario final
Cuestionario final
Timestamp	¿Acepta participar y responder este cuestionario?	Escribe las letras y números que aparecen en la imagen superior, exactamente igual:	1 ¿Cuál es su edad?	2. Estado civil:	3. Número de hijos (biológicos o adoptivos):	4. Lugar de nacimiento	5. Área de estudios principal:	6. Conozco y estoy enterada acerca de las técnicas de reproducción asistida	7. El acceso a las técnicas de reproducción asistida en México debe ser igual para todas las personas	8. Las técnicas de reproducción asistida pueden ayudar a evitar el nacimiento de niños(as) con enfermedades genéticas	9. Las técnicas de reproducción asistida hacen posible la procreación en familias no tradicionales, abriendo espacios a la diversidad sexual	10. Las técnicas de reproducción asistida permiten la postergación de la maternidad	11. La edad de la mujer debe ser considerada para ser candidata a las técnicas de reproducción asistida	12. La reproducción asistida favorece los intereses de los padres de intención y no los de los niños(as)	13. No me parece correcto manipular los embriones	14. Ser mujer no significa [tener que] ser madre	15. Conozco y estoy enterada acerca de los procesos de donación o venta de gametos (óvulos o espermatozoides)	16. Conozco y estoy enterada acerca del proceso de inseminación artificial	17. Los gametos (óvulos y espermatozoides) contienen material genético por lo que no deberían donarse o venderse	18. La donación de gametos está justificada para que otras personas puedan ser padres/madres	19. No considero adecuado solicitar atributos físicos (estatura, color de ojos, color de piel, etc.) a los donantes de gametos	20. No considero correcto solicitar atributos intelectuales (como calificaciones o puntajes en pruebas de conocimientos) a los donantes de gametos	21. No se debe excluir a los donantes de gametos con alguna discapacidad física	22. Los hijos de donadores de gametos tienen derecho a saber quiénes son sus padres biológicos	23. Conozco y estoy enterada acerca del procedimiento de fertilización in vitro	24. Los embriones sobrantes del proceso de fertilización in vitro no deben ser donados o vendidos	25. La venta de embriones no se justifica para que otras personas puedan ser padres/madres	26. No me parece correcto seleccionar el sexo y atributos físicos en los embriones	27. Me parece correcto seleccionar embriones genéticamente sanos	28. La manipulación de embriones debe limitarse a corregir algún problema genético y no introducir características físicas y/o intelectuales orientadas a mejorar la especie	29. Conozco y estoy enterada acerca de la maternidad subrogada (renta de vientre)	30. No me parece correcto que la maternidad subrogada sea remunerada	31. La maternidad subrogada no respeta la autonomía de la mujer gestante	32. La maternidad subrogada no debería ser una manera de lograr independencia económica para las mujeres	33. La maternidad subrogada toma ventaja de la situación socioeconómica de las mujeres	34. El proceso de subrogación de vientre genera vulnerabilidad en la madre gestante y/o en el recién nacido	35. La maternidad subrogada puede evitar complicaciones asociadas a embarazos de alto riesgo en algunas mujeres	36. Conozco y estoy enterada acerca del proceso de adopción	37. La adopción es una manera de ejercer la maternidad	38. La adopción tiene el fin de criar un hijo(a) y formar una familia	39. La edad de la mujer no es limitante para adoptar a un niño(a)	40. El proceso de adopción pone por delante los intereses del niño(a)	41. No considero importante que mi descendencia lleve mis genes	42. La crianza (y no los genes) es lo que define a los padres	43. Estaría dispuesta a ser madre de un menor en estado de abandono o desamparo	44. Con la adopción se adquieren los mismos compromisos y obligaciones que con un(a) hijo(a) biológico(a)	45. Si el proceso de adopción fuera menos complejo sería mi primera opción ante una situación de infertilidad
2025/10/15 4:41:11 pm GMT-6	Si acepto.	V653nz	Mayor de 29 años	Separada	0	Sinaloa	Ciencias ambientales	5. Completamente de acuerdo	5. Completamente de acuerdo	3. Ni de acuerdo ni en desacuerdo	5. Completamente de acuerdo	5. Completamente de acuerdo	3. Ni de acuerdo ni en desacuerdo	5. Completamente de acuerdo	3. Ni de acuerdo ni en desacuerdo	5. Completamente de acuerdo	3. Ni de acuerdo ni en desacuerdo	5. Completamente de acuerdo	3. Ni de acuerdo ni en desacuerdo	5. Completamente de acuerdo	3. Ni de acuerdo ni en desacuerdo	3. Ni de acuerdo ni en desacuerdo	3. Ni de acuerdo ni en desacuerdo	3. Ni de acuerdo ni en desacuerdo	5. Completamente de acuerdo	5. Completamente de acuerdo	3. Ni de acuerdo ni en desacuerdo	3. Ni de acuerdo ni en desacuerdo	5. Completamente de acuerdo	5. Completamente de acuerdo	5. Completamente de acuerdo	3. Ni de acuerdo ni en desacuerdo	3. Ni de acuerdo ni en desacuerdo	5. Completamente de acuerdo	3. Ni de acuerdo ni en desacuerdo	3. Ni de acuerdo ni en desacuerdo	5. Completamente de acuerdo	5. Completamente de acuerdo	5. Completamente de acuerdo	5. Completamente de acuerdo	5. Completamente de acuerdo	3. Ni de acuerdo ni en desacuerdo	3. Ni de acuerdo ni en desacuerdo	3. Ni de acuerdo ni en desacuerdo	5. Completamente de acuerdo	5. Completamente de acuerdo	5. Completamente de acuerdo
2025/10/15 4:56:54 pm GMT-6	Si acepto.	V653nz	24-26 años	Soltera	0	Sinaloa	Ciencias ambientales	4. De acuerdo	4. De acuerdo	5. Completamente de acuerdo	5. Completamente de acuerdo	4. De acuerdo	3. Ni de acuerdo ni en desacuerdo	4. De acuerdo	3. Ni de acuerdo ni en desacuerdo	5. Completamente de acuerdo	4. De acuerdo	4. De acuerdo	2. En desacuerdo	4. De acuerdo	2. En desacuerdo	2. En desacuerdo	2. En desacuerdo	2. En desacuerdo	4. De acuerdo	2. En desacuerdo	2. En desacuerdo	4. De acuerdo	4. De acuerdo	4. De acuerdo	4. De acuerdo	2. En desacuerdo	2. En desacuerdo	3. Ni de acuerdo ni en desacuerdo	3. Ni de acuerdo ni en desacuerdo	2. En desacuerdo	4. De acuerdo	4. De acuerdo	4. De acuerdo	4. De acuerdo	2. En desacuerdo	4. De acuerdo	4. De acuerdo	4. De acuerdo	4. De acuerdo	4. De acuerdo	4. De acuerdo
2025/10/15 5:05:50 pm GMT-6	Si acepto.	V653nz	24-26 años	Soltera	0	Sinaloa	Ciencias de la salud (humana o animal)	4. De acuerdo	5. Completamente de acuerdo	4. De acuerdo	5. Completamente de acuerdo	5. Completamente de acuerdo	4. De acuerdo	3. Ni de acuerdo ni en desacuerdo	5. Completamente de acuerdo	5. Completamente de acuerdo	4. De acuerdo	4. De acuerdo	4. De acuerdo	2. En desacuerdo	5. Completamente de acuerdo	5. Completamente de acuerdo	2. En desacuerdo	4. De acuerdo	4. De acuerdo	4. De acuerdo	5. Completamente de acuerdo	5. Completamente de acuerdo	4. De acuerdo	5. Completamente de acuerdo	5. Completamente de acuerdo	5. Completamente de acuerdo	4. De acuerdo	5. Completamente de acuerdo	5. Completamente de acuerdo	5. Completamente de acuerdo	4. De acuerdo	4. De acuerdo	5. Completamente de acuerdo	5. Completamente de acuerdo	2. En desacuerdo	4. De acuerdo	5. Completamente de acuerdo	5. Completamente de acuerdo	5. Completamente de acuerdo	5. Completamente de acuerdo	5. Completamente de acuerdo
2025/10/15 10:03:43 pm GMT-6	Si acepto.	V653nz	27-29 años	Concubinato	0	Jalisco	Ciencias de la salud (humana o animal)	5. Completamente de acuerdo	3. Ni de acuerdo ni en desacuerdo	5. Completamente de acuerdo	3. Ni de acuerdo ni en desacuerdo	4. De acuerdo	5. Completamente de acuerdo	5. Completamente de acuerdo	1. Completamente en desacuerdo	5. Completamente de acuerdo	5. Completamente de acuerdo	5. Completamente de acuerdo	1. Completamente en desacuerdo	5. Completamente de acuerdo	3. Ni de acuerdo ni en desacuerdo	3. Ni de acuerdo ni en desacuerdo	1. Completamente en desacuerdo	2. En desacuerdo	5. Completamente de acuerdo	3. Ni de acuerdo ni en desacuerdo	3. Ni de acuerdo ni en desacuerdo	1. Completamente en desacuerdo	5. Completamente de acuerdo	3. Ni de acuerdo ni en desacuerdo	5. Completamente de acuerdo	1. Completamente en desacuerdo	1. Completamente en desacuerdo	1. Completamente en desacuerdo	4. De acuerdo	4. De acuerdo	5. Completamente de acuerdo	4. De acuerdo	4. De acuerdo	4. De acuerdo	2. En desacuerdo	5. Completamente de acuerdo	3. Ni de acuerdo ni en desacuerdo	5. Completamente de acuerdo	5. Completamente de acuerdo	5. Completamente de acuerdo	5. Completamente de acuerdo
2025/10/16 1:29:58 pm GMT-6	Si acepto.	V653nz	Mayor de 29 años	Concubinato	1-2	Jalisco	Ciencias naturales o exactas	4. De acuerdo	5. Completamente de acuerdo	5. Completamente de acuerdo	5. Completamente de acuerdo	5. Completamente de acuerdo	5. Completamente de acuerdo	5. Completamente de acuerdo	3. Ni de acuerdo ni en desacuerdo	5. Completamente de acuerdo	2. En desacuerdo	4. De acuerdo	2. En desacuerdo	3. Ni de acuerdo ni en desacuerdo	5. Completamente de acuerdo	5. Completamente de acuerdo	4. De acuerdo	5. Completamente de acuerdo	5. Completamente de acuerdo	4. De acuerdo	5. Completamente de acuerdo	5. Completamente de acuerdo	3. Ni de acuerdo ni en desacuerdo	5. Completamente de acuerdo	5. Completamente de acuerdo	2. En desacuerdo	2. En desacuerdo	5. Completamente de acuerdo	5. Completamente de acuerdo	5. Completamente de acuerdo	3. Ni de acuerdo ni en desacuerdo	5. Completamente de acuerdo	5. Completamente de acuerdo	5. Completamente de acuerdo	3. Ni de acuerdo ni en desacuerdo	4. De acuerdo	5. Completamente de acuerdo	5. Completamente de acuerdo	5. Completamente de acuerdo	5. Completamente de acuerdo	5. Completamente de acuerdo
2025/10/17 11:57:36 am GMT-6	Si acepto.	V653nz	Mayor de 29 años	Soltera	0	Sinaloa	Biotecnología	5. Completamente de acuerdo	4. De acuerdo	4. De acuerdo	4. De acuerdo	5. Completamente de acuerdo	4. De acuerdo	4. De acuerdo	3. Ni de acuerdo ni en desacuerdo	5. Completamente de acuerdo	2. En desacuerdo	5. Completamente de acuerdo	3. Ni de acuerdo ni en desacuerdo	4. De acuerdo	5. Completamente de acuerdo	5. Completamente de acuerdo	1. Completamente en desacuerdo	5. Completamente de acuerdo	5. Completamente de acuerdo	5. Completamente de acuerdo	2. En desacuerdo	4. De acuerdo	5. Completamente de acuerdo	5. Completamente de acuerdo	5. Completamente de acuerdo	1. Completamente en desacuerdo	3. Ni de acuerdo ni en desacuerdo	5. Completamente de acuerdo	5. Completamente de acuerdo	5. Completamente de acuerdo	5. Completamente de acuerdo	5. Completamente de acuerdo	5. Completamente de acuerdo	5. Completamente de acuerdo	5. Completamente de acuerdo	2. En desacuerdo	5. Completamente de acuerdo	5. Completamente de acuerdo	5. Completamente de acuerdo	5. Completamente de acuerdo	5. Completamente de acuerdo
2025/10/27 4:15:16 pm GMT-6	Si acepto.	V653nz	27-29 años	Concubinato	0	Sinaloa	Ciencias de la salud (humana o animal)	3. Ni de acuerdo ni en desacuerdo	5. Completamente de acuerdo	4. De acuerdo	5. Completamente de acuerdo	5. Completamente de acuerdo	3. Ni de acuerdo ni en desacuerdo	4. De acuerdo	2. En desacuerdo	5. Completamente de acuerdo	2. En desacuerdo	3. Ni de acuerdo ni en desacuerdo	2. En desacuerdo	4. De acuerdo	5. Completamente de acuerdo	5. Completamente de acuerdo	3. Ni de acuerdo ni en desacuerdo	3. Ni de acuerdo ni en desacuerdo	3. Ni de acuerdo ni en desacuerdo	2. En desacuerdo	4. De acuerdo	4. De acuerdo	5. Completamente de acuerdo	5. Completamente de acuerdo	4. De acuerdo	4. De acuerdo	4. De acuerdo	5. Completamente de acuerdo	5. Completamente de acuerdo	5. Completamente de acuerdo	3. Ni de acuerdo ni en desacuerdo	3. Ni de acuerdo ni en desacuerdo	5. Completamente de acuerdo	5. Completamente de acuerdo	3. Ni de acuerdo ni en desacuerdo	3. Ni de acuerdo ni en desacuerdo	4. De acuerdo	5. Completamente de acuerdo	4. De acuerdo	5. Completamente de acuerdo	5. Completamente de acuerdo
2025/10/28 10:54:22 pm GMT-6	Si acepto.	V653nz	Mayor de 29 años	Casada	1-2	Ciudad de México	Ciencias naturales o exactas	4. De acuerdo	2. En desacuerdo	4. De acuerdo	4. De acuerdo	5. Completamente de acuerdo	4. De acuerdo	2. En desacuerdo	1. Completamente en desacuerdo	5. Completamente de acuerdo	2. En desacuerdo	3. Ni de acuerdo ni en desacuerdo	2. En desacuerdo	4. De acuerdo	3. Ni de acuerdo ni en desacuerdo	3. Ni de acuerdo ni en desacuerdo	3. Ni de acuerdo ni en desacuerdo	3. Ni de acuerdo ni en desacuerdo	3. Ni de acuerdo ni en desacuerdo	2. En desacuerdo	2. En desacuerdo	3. Ni de acuerdo ni en desacuerdo	5. Completamente de acuerdo	2. En desacuerdo	4. De acuerdo	2. En desacuerdo	2. En desacuerdo	4. De acuerdo	4. De acuerdo	3. Ni de acuerdo ni en desacuerdo	4. De acuerdo	3. Ni de acuerdo ni en desacuerdo	5. Completamente de acuerdo	3. Ni de acuerdo ni en desacuerdo	2. En desacuerdo	4. De acuerdo	5. Completamente de acuerdo	5. Completamente de acuerdo	5. Completamente de acuerdo	5. Completamente de acuerdo	5. Completamente de acuerdo
2025/10/29 5:31:50 pm GMT-6	Si acepto.	V653nz	Mayor de 29 años	Concubinato	0	Sinaloa	Biotecnología	4. De acuerdo	5. Completamente de acuerdo	3. Ni de acuerdo ni en desacuerdo	5. Completamente de acuerdo	5. Completamente de acuerdo	2. En desacuerdo	2. En desacuerdo	1. Completamente en desacuerdo	5. Completamente de acuerdo	2. En desacuerdo	5. Completamente de acuerdo	2. En desacuerdo	4. De acuerdo	2. En desacuerdo	2. En desacuerdo	4. De acuerdo	1. Completamente en desacuerdo	4. De acuerdo	5. Completamente de acuerdo	5. Completamente de acuerdo	3. Ni de acuerdo ni en desacuerdo	5. Completamente de acuerdo	1. Completamente en desacuerdo	5. Completamente de acuerdo	1. Completamente en desacuerdo	1. Completamente en desacuerdo	2. En desacuerdo	4. De acuerdo	2. En desacuerdo	5. Completamente de acuerdo	2. En desacuerdo	5. Completamente de acuerdo	5. Completamente de acuerdo	4. De acuerdo	3. Ni de acuerdo ni en desacuerdo	2. En desacuerdo	5. Completamente de acuerdo	5. Completamente de acuerdo	5. Completamente de acuerdo	3. Ni de acuerdo ni en desacuerdo
2025/11/05 8:32:37 am GMT-7	Si acepto.	V653nz	Mayor de 29 años	Soltera	0	Sinaloa	Biotecnología	4. De acuerdo	5. Completamente de acuerdo	3. Ni de acuerdo ni en desacuerdo	5. Completamente de acuerdo	4. De acuerdo	5. Completamente de acuerdo	4. De acuerdo	2. En desacuerdo	5. Completamente de acuerdo	4. De acuerdo	4. De acuerdo	2. En desacuerdo	4. De acuerdo	4. De acuerdo	4. De acuerdo	2. En desacuerdo	3. Ni de acuerdo ni en desacuerdo	4. De acuerdo	3. Ni de acuerdo ni en desacuerdo	2. En desacuerdo	4. De acuerdo	4. De acuerdo	4. De acuerdo	4. De acuerdo	2. En desacuerdo	3. Ni de acuerdo ni en desacuerdo	4. De acuerdo	4. De acuerdo	4. De acuerdo	4. De acuerdo	5. Completamente de acuerdo	5. Completamente de acuerdo	5. Completamente de acuerdo	2. En desacuerdo	3. Ni de acuerdo ni en desacuerdo	3. Ni de acuerdo ni en desacuerdo	5. Completamente de acuerdo	5. Completamente de acuerdo	5. Completamente de acuerdo	4. De acuerdo
2025/11/05 2:33:00 pm GMT-7	Si acepto.	V653nz	Mayor de 29 años	Soltera	0	Sinaloa	Ciencias de la salud (humana o animal)	5. Completamente de acuerdo	5. Completamente de acuerdo	4. De acuerdo	4. De acuerdo	5. Completamente de acuerdo	3. Ni de acuerdo ni en desacuerdo	5. Completamente de acuerdo	3. Ni de acuerdo ni en desacuerdo	5. Completamente de acuerdo	5. Completamente de acuerdo	5. Completamente de acuerdo	3. Ni de acuerdo ni en desacuerdo	4. De acuerdo	5. Completamente de acuerdo	5. Completamente de acuerdo	3. Ni de acuerdo ni en desacuerdo	2. En desacuerdo	5. Completamente de acuerdo	4. De acuerdo	2. En desacuerdo	5. Completamente de acuerdo	5. Completamente de acuerdo	5. Completamente de acuerdo	5. Completamente de acuerdo	1. Completamente en desacuerdo	4. De acuerdo	5. Completamente de acuerdo	5. Completamente de acuerdo	5. Completamente de acuerdo	4. De acuerdo	5. Completamente de acuerdo	5. Completamente de acuerdo	5. Completamente de acuerdo	5. Completamente de acuerdo	5. Completamente de acuerdo	3. Ni de acuerdo ni en desacuerdo	5. Completamente de acuerdo	4. De acuerdo	5. Completamente de acuerdo	4. De acuerdo
2025/11/05 2:43:51 pm GMT-7	Si acepto.	V653nz	24-26 años	Soltera	0	Sinaloa	Biotecnología	4. De acuerdo	4. De acuerdo	3. Ni de acuerdo ni en desacuerdo	5. Completamente de acuerdo	4. De acuerdo	4. De acuerdo	3. Ni de acuerdo ni en desacuerdo	2. En desacuerdo	5. Completamente de acuerdo	4. De acuerdo	4. De acuerdo	3. Ni de acuerdo ni en desacuerdo	4. De acuerdo	4. De acuerdo	4. De acuerdo	2. En desacuerdo	4. De acuerdo	4. De acuerdo	3. Ni de acuerdo ni en desacuerdo	3. Ni de acuerdo ni en desacuerdo	4. De acuerdo	4. De acuerdo	5. Completamente de acuerdo	4. De acuerdo	3. Ni de acuerdo ni en desacuerdo	4. De acuerdo	4. De acuerdo	3. Ni de acuerdo ni en desacuerdo	4. De acuerdo	4. De acuerdo	5. Completamente de acuerdo	5. Completamente de acuerdo	5. Completamente de acuerdo	3. Ni de acuerdo ni en desacuerdo	3. Ni de acuerdo ni en desacuerdo	3. Ni de acuerdo ni en desacuerdo	5. Completamente de acuerdo	5. Completamente de acuerdo	5. Completamente de acuerdo	4. De acuerdo
2025/11/05 3:20:44 pm GMT-7	Si acepto.	V653nz	24-26 años	Soltera	0	Sinaloa	Ciencias naturales o exactas	3. Ni de acuerdo ni en desacuerdo	5. Completamente de acuerdo	3. Ni de acuerdo ni en desacuerdo	5. Completamente de acuerdo	3. Ni de acuerdo ni en desacuerdo	4. De acuerdo	1. Completamente en desacuerdo	2. En desacuerdo	5. Completamente de acuerdo	2. En desacuerdo	3. Ni de acuerdo ni en desacuerdo	1. Completamente en desacuerdo	5. Completamente de acuerdo	1. Completamente en desacuerdo	5. Completamente de acuerdo	3. Ni de acuerdo ni en desacuerdo	4. De acuerdo	2. En desacuerdo	3. Ni de acuerdo ni en desacuerdo	3. Ni de acuerdo ni en desacuerdo	3. Ni de acuerdo ni en desacuerdo	5. Completamente de acuerdo	4. De acuerdo	4. De acuerdo	1. Completamente en desacuerdo	3. Ni de acuerdo ni en desacuerdo	4. De acuerdo	3. Ni de acuerdo ni en desacuerdo	5. Completamente de acuerdo	4. De acuerdo	5. Completamente de acuerdo	5. Completamente de acuerdo	4. De acuerdo	4. De acuerdo	3. Ni de acuerdo ni en desacuerdo	3. Ni de acuerdo ni en desacuerdo	5. Completamente de acuerdo	3. Ni de acuerdo ni en desacuerdo	5. Completamente de acuerdo	3. Ni de acuerdo ni en desacuerdo
2025/11/05 4:51:52 pm GMT-7	Si acepto.	V653nz	Mayor de 29 años	Soltera	0	Sinaloa	Biotecnología	4. De acuerdo	3. Ni de acuerdo ni en desacuerdo	2. En desacuerdo	4. De acuerdo	4. De acuerdo	4. De acuerdo	3. Ni de acuerdo ni en desacuerdo	4. De acuerdo	4. De acuerdo	4. De acuerdo	4. De acuerdo	3. Ni de acuerdo ni en desacuerdo	3. Ni de acuerdo ni en desacuerdo	4. De acuerdo	4. De acuerdo	3. Ni de acuerdo ni en desacuerdo	4. De acuerdo	4. De acuerdo	4. De acuerdo	3. Ni de acuerdo ni en desacuerdo	4. De acuerdo	3. Ni de acuerdo ni en desacuerdo	4. De acuerdo	4. De acuerdo	3. Ni de acuerdo ni en desacuerdo	3. Ni de acuerdo ni en desacuerdo	3. Ni de acuerdo ni en desacuerdo	4. De acuerdo	3. Ni de acuerdo ni en desacuerdo	4. De acuerdo	4. De acuerdo	4. De acuerdo	5. Completamente de acuerdo	5. Completamente de acuerdo	3. Ni de acuerdo ni en desacuerdo	3. Ni de acuerdo ni en desacuerdo	3. Ni de acuerdo ni en desacuerdo	4. De acuerdo	5. Completamente de acuerdo	3. Ni de acuerdo ni en desacuerdo
2025/11/05 4:52:41 pm GMT-7	Si acepto.	V653nz	Mayor de 29 años	Casada	0	Sinaloa	Turismo	2. En desacuerdo	5. Completamente de acuerdo	4. De acuerdo	4. De acuerdo	4. De acuerdo	5. Completamente de acuerdo	4. De acuerdo	2. En desacuerdo	5. Completamente de acuerdo	2. En desacuerdo	2. En desacuerdo	2. En desacuerdo	4. De acuerdo	3. Ni de acuerdo ni en desacuerdo	3. Ni de acuerdo ni en desacuerdo	2. En desacuerdo	3. Ni de acuerdo ni en desacuerdo	3. Ni de acuerdo ni en desacuerdo	2. En desacuerdo	2. En desacuerdo	2. En desacuerdo	4. De acuerdo	3. Ni de acuerdo ni en desacuerdo	3. Ni de acuerdo ni en desacuerdo	3. Ni de acuerdo ni en desacuerdo	3. Ni de acuerdo ni en desacuerdo	4. De acuerdo	4. De acuerdo	4. De acuerdo	4. De acuerdo	3. Ni de acuerdo ni en desacuerdo	4. De acuerdo	3. Ni de acuerdo ni en desacuerdo	2. En desacuerdo	3. Ni de acuerdo ni en desacuerdo	4. De acuerdo	3. Ni de acuerdo ni en desacuerdo	4. De acuerdo	5. Completamente de acuerdo	4. De acuerdo
2025/11/05 5:18:56 pm GMT-7	Si acepto.	V653nz	27-29 años	Soltera	0	Sinaloa	Ciencias naturales o exactas	5. Completamente de acuerdo	5. Completamente de acuerdo	5. Completamente de acuerdo	5. Completamente de acuerdo	5. Completamente de acuerdo	5. Completamente de acuerdo	3. Ni de acuerdo ni en desacuerdo	4. De acuerdo	5. Completamente de acuerdo	4. De acuerdo	4. De acuerdo	3. Ni de acuerdo ni en desacuerdo	5. Completamente de acuerdo	4. De acuerdo	4. De acuerdo	2. En desacuerdo	4. De acuerdo	4. De acuerdo	4. De acuerdo	4. De acuerdo	2. En desacuerdo	5. Completamente de acuerdo	4. De acuerdo	4. De acuerdo	2. En desacuerdo	4. De acuerdo	4. De acuerdo	4. De acuerdo	4. De acuerdo	4. De acuerdo	4. De acuerdo	5. Completamente de acuerdo	5. Completamente de acuerdo	2. En desacuerdo	3. Ni de acuerdo ni en desacuerdo	1. Completamente en desacuerdo	4. De acuerdo	2. En desacuerdo	5. Completamente de acuerdo	2. En desacuerdo
2025/11/13 9:27:36 am GMT-7	Si acepto.	V653nz	37 años	Casada	0	Sinaloa	Otro	2. En desacuerdo	4. De acuerdo	4. De acuerdo	3. Ni de acuerdo ni en desacuerdo	2. En desacuerdo	4. De acuerdo	3. Ni de acuerdo ni en desacuerdo	4. De acuerdo	5. Completamente de acuerdo	1. Completamente en desacuerdo	1. Completamente en desacuerdo	2. En desacuerdo	4. De acuerdo	4. De acuerdo	4. De acuerdo	2. En desacuerdo	2. En desacuerdo	2. En desacuerdo	4. De acuerdo	2. En desacuerdo	2. En desacuerdo	4. De acuerdo	4. De acuerdo	2. En desacuerdo	3. Ni de acuerdo ni en desacuerdo	2. En desacuerdo	3. Ni de acuerdo ni en desacuerdo	4. De acuerdo	4. De acuerdo	4. De acuerdo	3. Ni de acuerdo ni en desacuerdo	4. De acuerdo	4. De acuerdo	2. En desacuerdo	4. De acuerdo	4. De acuerdo	4. De acuerdo	4. De acuerdo	5. Completamente de acuerdo	5. Completamente de acuerdo
2025/11/17 8:51:46 am GMT-7	Si acepto.	V653nz	27-29 años	Concubinato	1-2	Sinaloa	Biotecnología	4. De acuerdo	5. Completamente de acuerdo	3. Ni de acuerdo ni en desacuerdo	4. De acuerdo	5. Completamente de acuerdo	3. Ni de acuerdo ni en desacuerdo	4. De acuerdo	1. Completamente en desacuerdo	5. Completamente de acuerdo	2. En desacuerdo	2. En desacuerdo	1. Completamente en desacuerdo	3. Ni de acuerdo ni en desacuerdo	3. Ni de acuerdo ni en desacuerdo	3. Ni de acuerdo ni en desacuerdo	2. En desacuerdo	1. Completamente en desacuerdo	2. En desacuerdo	2. En desacuerdo	2. En desacuerdo	3. Ni de acuerdo ni en desacuerdo	5. Completamente de acuerdo	4. De acuerdo	3. Ni de acuerdo ni en desacuerdo	1. Completamente en desacuerdo	2. En desacuerdo	2. En desacuerdo	4. De acuerdo	4. De acuerdo	3. Ni de acuerdo ni en desacuerdo	1. Completamente en desacuerdo	4. De acuerdo	5. Completamente de acuerdo	3. Ni de acuerdo ni en desacuerdo	4. De acuerdo	4. De acuerdo	5. Completamente de acuerdo	5. Completamente de acuerdo	5. Completamente de acuerdo	5. Completamente de acuerdo
2025/11/17 11:04:02 am GMT-7	Si acepto.	V653nz	24-26 años	Soltera	0	Sinaloa	Ciencias de la salud (humana o animal)	5. Completamente de acuerdo	5. Completamente de acuerdo	5. Completamente de acuerdo	5. Completamente de acuerdo	5. Completamente de acuerdo	4. De acuerdo	2. En desacuerdo	2. En desacuerdo	5. Completamente de acuerdo	1. Completamente en desacuerdo	5. Completamente de acuerdo	1. Completamente en desacuerdo	5. Completamente de acuerdo	3. Ni de acuerdo ni en desacuerdo	3. Ni de acuerdo ni en desacuerdo	1. Completamente en desacuerdo	3. Ni de acuerdo ni en desacuerdo	5. Completamente de acuerdo	4. De acuerdo	5. Completamente de acuerdo	3. Ni de acuerdo ni en desacuerdo	5. Completamente de acuerdo	5. Completamente de acuerdo	5. Completamente de acuerdo	1. Completamente en desacuerdo	1. Completamente en desacuerdo	1. Completamente en desacuerdo	1. Completamente en desacuerdo	3. Ni de acuerdo ni en desacuerdo	5. Completamente de acuerdo	5. Completamente de acuerdo	5. Completamente de acuerdo	5. Completamente de acuerdo	5. Completamente de acuerdo	5. Completamente de acuerdo	2. En desacuerdo	5. Completamente de acuerdo	3. Ni de acuerdo ni en desacuerdo	5. Completamente de acuerdo	3. Ni de acuerdo ni en desacuerdo
2025/11/17 11:07:37 pm GMT-7	Si acepto.	V653nz	24-26 años	Soltera	0	Sinaloa	Biotecnología	2. En desacuerdo	5. Completamente de acuerdo	4. De acuerdo	5. Completamente de acuerdo	4. De acuerdo	3. Ni de acuerdo ni en desacuerdo	1. Completamente en desacuerdo	1. Completamente en desacuerdo	5. Completamente de acuerdo	4. De acuerdo	4. De acuerdo	2. En desacuerdo	4. De acuerdo	3. Ni de acuerdo ni en desacuerdo	5. Completamente de acuerdo	3. Ni de acuerdo ni en desacuerdo	3. Ni de acuerdo ni en desacuerdo	2. En desacuerdo	3. Ni de acuerdo ni en desacuerdo	2. En desacuerdo	3. Ni de acuerdo ni en desacuerdo	5. Completamente de acuerdo	5. Completamente de acuerdo	4. De acuerdo	3. Ni de acuerdo ni en desacuerdo	3. Ni de acuerdo ni en desacuerdo	5. Completamente de acuerdo	4. De acuerdo	4. De acuerdo	2. En desacuerdo	4. De acuerdo	5. Completamente de acuerdo	5. Completamente de acuerdo	4. De acuerdo	3. Ni de acuerdo ni en desacuerdo	4. De acuerdo	4. De acuerdo	4. De acuerdo	5. Completamente de acuerdo	4. De acuerdo
2025/11/28 9:55:29 am GMT-7	Si acepto.	V653nz	24-26 años	Soltera	0	Baja California Sur	Otro	3. Ni de acuerdo ni en desacuerdo	3. Ni de acuerdo ni en desacuerdo	3. Ni de acuerdo ni en desacuerdo	3. Ni de acuerdo ni en desacuerdo	3. Ni de acuerdo ni en desacuerdo	1. Completamente en desacuerdo	3. Ni de acuerdo ni en desacuerdo	3. Ni de acuerdo ni en desacuerdo	5. Completamente de acuerdo	3. Ni de acuerdo ni en desacuerdo	3. Ni de acuerdo ni en desacuerdo	3. Ni de acuerdo ni en desacuerdo	4. De acuerdo	5. Completamente de acuerdo	5. Completamente de acuerdo	3. Ni de acuerdo ni en desacuerdo	5. Completamente de acuerdo	3. Ni de acuerdo ni en desacuerdo	5. Completamente de acuerdo	3. Ni de acuerdo ni en desacuerdo	5. Completamente de acuerdo	4. De acuerdo	5. Completamente de acuerdo	3. Ni de acuerdo ni en desacuerdo	1. Completamente en desacuerdo	3. Ni de acuerdo ni en desacuerdo	3. Ni de acuerdo ni en desacuerdo	3. Ni de acuerdo ni en desacuerdo	3. Ni de acuerdo ni en desacuerdo	5. Completamente de acuerdo	1. Completamente en desacuerdo	5. Completamente de acuerdo	5. Completamente de acuerdo	3. Ni de acuerdo ni en desacuerdo	3. Ni de acuerdo ni en desacuerdo	5. Completamente de acuerdo	5. Completamente de acuerdo	5. Completamente de acuerdo	5. Completamente de acuerdo	5. Completamente de acuerdo
								5	5	3	5	5	3	5	3	5	3	5	3	5	3	3	3	3	5	5	3	3	5	5	5	3	3	5	3	3	5	5	5	5	5	3	3	3	5	5	5
								4	4	5	5	4	3	4	3	5	4	4	2	4	2	2	2	2	4	2	2	4	4	4	4	2	2	3	3	2	4	4	4	4	2	4	4	4	4	4	4
								4	5	4	5	5	4	3	5	5	4	4	4	2	5	5	2	4	4	4	5	5	4	5	5	5	4	5	5	5	4	4	5	5	2	4	5	5	5	5	5
								5	3	5	3	4	5	5	1	5	5	5	1	5	3	3	1	2	5	3	3	1	5	3	5	1	1	1	4	4	5	4	4	4	2	5	3	5	5	5	5
								4	5	5	5	5	5	5	3	5	2	4	2	3	5	5	4	5	5	4	5	5	3	5	5	2	2	5	5	5	3	5	5	5	3	4	5	5	5	5	5
								5	4	4	4	5	4	4	3	5	2	5	3	4	5	5	1	5	5	5	2	4	5	5	5	1	3	5	5	5	5	5	5	5	5	2	5	5	5	5	5
								3	5	4	5	5	3	4	2	5	2	3	2	4	5	5	3	3	3	2	4	4	5	5	4	4	4	5	5	5	3	3	5	5	3	3	4	5	4	5	5
								4	2	4	4	5	4	2	1	5	2	3	2	4	3	3	3	3	3	2	2	3	5	2	4	2	2	4	4	3	4	3	5	3	2	4	5	5	5	5	5
								4	5	3	5	5	2	2	1	5	2	5	2	4	2	2	4	1	4	5	5	3	5	1	5	1	1	2	4	2	5	2	5	5	4	3	2	5	5	5	3
								4	5	3	5	4	5	4	2	5	4	4	2	4	4	4	2	3	4	3	2	4	4	4	4	2	3	4	4	4	4	5	5	5	2	3	3	5	5	5	4
								5	5	4	4	5	3	5	3	5	5	5	3	4	5	5	3	2	5	4	2	5	5	5	5	1	4	5	5	5	4	5	5	5	5	5	3	5	4	5	4
								4	4	3	5	4	4	3	2	5	4	4	3	4	4	4	2	4	4	3	3	4	4	5	4	3	4	4	3	4	4	5	5	5	3	3	3	5	5	5	4
								3	5	3	5	3	4	1	2	5	2	3	1	5	1	5	3	4	2	3	3	3	5	4	4	1	3	4	3	5	4	5	5	4	4	3	3	5	3	5	3
								4	3	2	4	4	4	3	4	4	4	4	3	3	4	4	3	4	4	4	3	4	3	4	4	3	3	3	4	3	4	4	4	5	5	3	3	3	4	5	3
								2	5	4	4	4	5	4	2	5	2	2	2	4	3	3	2	3	3	2	2	2	4	3	3	3	3	4	4	4	4	3	4	3	2	3	4	3	4	5	4
								5	5	5	5	5	5	3	4	5	4	4	3	5	4	4	2	4	4	4	4	2	5	4	4	2	4	4	4	4	4	4	5	5	2	3	1	4	2	5	2
								2	4	4	3	2	4	3	4	5	1	1	2	4	4	4	2	2	2	4	2	2	4	4	2	3	2	3	4	4	4	3	4	4	2	4	4	4	4	5	5
								4	5	3	4	5	3	4	1	5	2	2	1	3	3	3	2	1	2	2	2	3	5	4	3	1	2	2	4	4	3	1	4	5	3	4	4	5	5	5	5
								5	5	5	5	5	4	2	2	5	1	5	1	5	3	3	1	3	5	4	5	3	5	5	5	1	1	1	1	3	5	5	5	5	5	5	2	5	3	5	3
								2	5	4	5	4	3	1	1	5	4	4	2	4	3	5	3	3	2	3	2	3	5	5	4	3	3	5	4	4	2	4	5	5	4	3	4	4	4	5	4
								3	3	3	3	3	1	3	3	5	3	3	3	4	5	5	3	5	3	5	3	5	4	5	3	1	3	5	3	3	5	1	5	5	3	3	5	5	5	5	5
							Mean	3.85714	4.38095	3.80952	4.42857	4.33333	3.71429	3.33333	2.47619	4.95238	2.95238	3.7619	2.2381	4	3.61905	3.90476	2.42857	3.14286	3.71429	3.47619	3.04762	3.42857	4.47619	4.14286	4.14286	2.14286	2.71429	3.7619	3.85714	3.85714	4.04762	3.80952	4.71429	4.61905	3.2381	3.52381	3.57143	4.52381	4.33333	4.95238	4.19048
							std dev	1.01419	0.920662	0.872872	0.74642	0.856349	1.0556	1.23828	1.16701	0.218218	1.24403	1.13599	0.830949	0.774597	1.16087	1.04426	0.87014	1.19523	1.10195	1.07792	1.16087	1.12122	0.679636	1.10841	0.853564	1.15264	1.00712	1.33809	0.963624	0.963624	0.804748	1.28915	0.46291	0.669043	1.22085	0.813575	1.12122	0.749603	0.856349	0.218218	0.928388
							median	4	5	4	5	5	4	3	2	5	3	4	2	4	4	4	2	3	4	4	3	3	5	4	4	2	3	4	4	4	4	4	5	5	3	3	4	5	5	5	4
							Mode	4	5	4	5	5	4	4	3	5	2	4	2	4	3	5	3	3	4	4	2	3	5	5	4	1	3	5	4	4	4	5	5	5	2	3	3	5	5	5	5
