# Supplementary material
Source: Research Square preprint supplement (doi:10.21203/rs.3.rs-9181995/v2)
Supplement: Supplementary file 1 [file 665d1c52d8d71651a76782e6.docx]

**Thoughts about motherhood among female students in Mexico: bioethical perspectives on assisted reproduction and adoption**

Alejandra García-Gasca.

Centro de Investigación en Alimentación y Desarrollo; Avenida Sabalo Cerritos sn, Mazatlán 82112 Mexico; [alegar@ciad.mx](mailto:alegar@ciad.mx)

CUESTIONARIO (The questionnaire is presented in its original language)

Elija la opción que corresponda y conteste las preguntas de acuerdo a lo que usted considera u opina.

Sección 1: Información general

1. Edad:

_18-20 años

_21-23 años

_24-26 años

_27-29 años

_más de 29 años

2. Estado civil:

_Soltera

_Casada

_Separada

_Viuda

_Concubinato

3. Número de hijos (biológicos o adoptivos)

_0

_1-2

_3 o más

4. Lugar de nacimiento - *se despliegan entidades federativas

5. Área de estudios principal - *se despliegan opciones

En las siguientes secciones, indica que tan de acuerdo o en desacuerdo estás con las declaraciones siguientes; la escala es de 1 al 5, siendo 1 “completamente en desacuerdo” y 5 “completamente de acuerdo”.

Sección 2: Opiniones sobre las técnicas de reproducción asistida

6. Conozco y estoy enterada acerca de las técnicas de reproducción asistida

_Completamente en desacuerdo

_En desacuerdo

_Ni de acuerdo ni en desacuerdo

_De acuerdo

_Completamente de acuerdo

7. El acceso a las técnicas de reproducción asistida en México debe ser igual para todas las personas

_Completamente en desacuerdo

_En desacuerdo

_Ni de acuerdo ni en desacuerdo

_De acuerdo

_Completamente de acuerdo

8. Las técnicas de reproducción asistida pueden ayudar a evitar el nacimiento de niños(as) con enfermedades genéticas

_Completamente en desacuerdo

_En desacuerdo

_Ni de acuerdo ni en desacuerdo

_De acuerdo

_Completamente de acuerdo

9. Las técnicas de reproducción asistida hacen posible la procreación en familias no tradicionales, abriendo espacios a la diversidad sexual

_Completamente en desacuerdo

_En desacuerdo

_Ni de acuerdo ni en desacuerdo

_De acuerdo

_Completamente de acuerdo

10. Las técnicas de reproducción asistida permiten la postergación de la maternidad

_Completamente en desacuerdo

_En desacuerdo

_Ni de acuerdo ni en desacuerdo

_De acuerdo

_Completamente de acuerdo

11. La edad de la mujer debe ser considerada para ser candidata a las técnicas de reproducción asistida

_Completamente en desacuerdo

_En desacuerdo

_Ni de acuerdo ni en desacuerdo

_De acuerdo

_Completamente de acuerdo

12. La reproducción asistida favorece los intereses de los padres de intención y no los de los niños(as)

_Completamente en desacuerdo

_En desacuerdo

_Ni de acuerdo ni en desacuerdo

_De acuerdo

_Completamente de acuerdo

13. Tengo derecho a decidir el ser o no ser madre

_Completamente en desacuerdo

_En desacuerdo

_Ni de acuerdo ni en desacuerdo

_De acuerdo

_Completamente de acuerdo

14. Ser mujer no significa [tener que] ser madre

_Completamente en desacuerdo

_En desacuerdo

_Ni de acuerdo ni en desacuerdo

_De acuerdo

_Completamente de acuerdo

Sección 3. Opiniones respecto a la donación/venta de gametos e inseminación artificial

15. Conozco y estoy enterada acerca de los procesos de donación o venta de gametos (óvulos o espermatozoides)

_Completamente en desacuerdo

_En desacuerdo

_Ni de acuerdo ni en desacuerdo

_De acuerdo

_Completamente de acuerdo

16. Conozco y estoy enterada acerca del proceso de inseminación artificial

_Completamente en desacuerdo

_En desacuerdo

_Ni de acuerdo ni en desacuerdo

_De acuerdo

_Completamente de acuerdo

17. Los gametos (óvulos y espermatozoides) contienen material genético por lo que no deberían donarse o venderse

_Completamente en desacuerdo

_En desacuerdo

_Ni de acuerdo ni en desacuerdo

_De acuerdo

_Completamente de acuerdo

18. La donación de gametos está justificada para que otras personas puedan ser padres/madres

_Completamente en desacuerdo

_En desacuerdo

_Ni de acuerdo ni en desacuerdo

_De acuerdo

_Completamente de acuerdo

19. No considero adecuado solicitar atributos físicos (estatura, color de ojos, color de piel, etc.) a los donantes de gametos

_Completamente en desacuerdo

_En desacuerdo

_Ni de acuerdo ni en desacuerdo

_De acuerdo

_Completamente de acuerdo

20. No considero correcto solicitar atributos intelectuales (como calificaciones o puntajes en pruebas de conocimientos) a los donantes de gametos

_Completamente en desacuerdo

_En desacuerdo

_Ni de acuerdo ni en desacuerdo

_De acuerdo

_Completamente de acuerdo

21. No se debe excluir a los donantes de gametos con alguna discapacidad física

_Completamente en desacuerdo

_En desacuerdo

_Ni de acuerdo ni en desacuerdo

_De acuerdo

_Completamente de acuerdo

22. Los hijos de donadores de gametos tienen derecho a saber quiénes son sus padres biológicos

_Completamente en desacuerdo

_En desacuerdo

_Ni de acuerdo ni en desacuerdo

_De acuerdo

_Completamente de acuerdo

Sección 4: Opiniones respecto a la fertilización in vitro y manipulación de embriones

23. Conozco y estoy enterada acerca del procedimiento de fertilización in vitro

_Completamente en desacuerdo

_En desacuerdo

_Ni de acuerdo ni en desacuerdo

_De acuerdo

_Completamente de acuerdo

24. Los embriones sobrantes del proceso de fertilización in vitro no deben ser donados o vendidos

_Completamente en desacuerdo

_En desacuerdo

_Ni de acuerdo ni en desacuerdo

_De acuerdo

_Completamente de acuerdo

25. La venta de embriones no se justifica para que otras personas puedan ser padres/madres

_Completamente en desacuerdo

_En desacuerdo

_Ni de acuerdo ni en desacuerdo

_De acuerdo

_Completamente de acuerdo

26. No me parece correcto seleccionar el sexo y atributos físicos en los embriones

_Completamente en desacuerdo

_En desacuerdo

_Ni de acuerdo ni en desacuerdo

_De acuerdo

_Completamente de acuerdo

27. Me parece correcto seleccionar embriones genéticamente sanos

_Completamente en desacuerdo

_En desacuerdo

_Ni de acuerdo ni en desacuerdo

_De acuerdo

_Completamente de acuerdo

28. La manipulación de embriones debe limitarse a corregir algún problema genético y no introducir características físicas y/o intelectuales orientadas a mejorar la especie

_Completamente en desacuerdo

_En desacuerdo

_Ni de acuerdo ni en desacuerdo

_De acuerdo

_Completamente de acuerdo

Sección 5: Opiniones respecto a la maternidad subrogada

29. Conozco y estoy enterada acerca de la maternidad subrogada (renta de vientre)

_Completamente en desacuerdo

_En desacuerdo

_Ni de acuerdo ni en desacuerdo

_De acuerdo

_Completamente de acuerdo

30. No me parece correcto que la maternidad subrogada sea remunerada

_Completamente en desacuerdo

_En desacuerdo

_Ni de acuerdo ni en desacuerdo

_De acuerdo

_Completamente de acuerdo

31. La maternidad subrogada no respeta la autonomía de la mujer gestante

_Completamente en desacuerdo

_En desacuerdo

_Ni de acuerdo ni en desacuerdo

_De acuerdo

_Completamente de acuerdo

32. La maternidad subrogada no debería ser una manera de lograr independencia económica para las mujeres

_Completamente en desacuerdo

_En desacuerdo

_Ni de acuerdo ni en desacuerdo

_De acuerdo

_Completamente de acuerdo

33. La maternidad subrogada toma ventaja de la situación socioeconómica de las mujeres

_Completamente en desacuerdo

_En desacuerdo

_Ni de acuerdo ni en desacuerdo

_De acuerdo

_Completamente de acuerdo

34. El proceso de subrogación de vientre genera vulnerabilidad en la madre gestante y/o en el recién nacido

_Completamente en desacuerdo

_En desacuerdo

_Ni de acuerdo ni en desacuerdo

_De acuerdo

_Completamente de acuerdo

35. La maternidad subrogada puede evitar complicaciones asociadas a embarazos de alto riesgo en algunas mujeres

_Completamente en desacuerdo

_En desacuerdo

_Ni de acuerdo ni en desacuerdo

_De acuerdo

_Completamente de acuerdo

Sección 6: Opiniones respecto a la adopción

36. Conozco y estoy enterada acerca del proceso de adopción

_Completamente en desacuerdo

_En desacuerdo

_Ni de acuerdo ni en desacuerdo

_De acuerdo

_Completamente de acuerdo

37. La adopción es una manera de ejercer la maternidad

_Completamente en desacuerdo

_En desacuerdo

_Ni de acuerdo ni en desacuerdo

_De acuerdo

_Completamente de acuerdo

38. La adopción tiene el fin de criar un hijo(a) y formar una familia

_Completamente en desacuerdo

_En desacuerdo

_Ni de acuerdo ni en desacuerdo

_De acuerdo

_Completamente de acuerdo

39. La edad de la mujer no es limitante para adoptar a un niño(a)

_Completamente en desacuerdo

_En desacuerdo

_Ni de acuerdo ni en desacuerdo

_De acuerdo

_Completamente de acuerdo

40. El proceso de adopción pone por delante los intereses del niño(a)

_Completamente en desacuerdo

_En desacuerdo

_Ni de acuerdo ni en desacuerdo

_De acuerdo

_Completamente de acuerdo

41. No considero importante que mi descendencia lleve mis genes

_Completamente en desacuerdo

_En desacuerdo

_Ni de acuerdo ni en desacuerdo

_De acuerdo

_Completamente de acuerdo

42. La crianza (y no los genes) es lo que define a los padres

_Completamente en desacuerdo

_En desacuerdo

_Ni de acuerdo ni en desacuerdo

_De acuerdo

_Completamente de acuerdo

43. Estaría dispuesta a ser madre de un menor en estado de abandono o desamparo

_Completamente en desacuerdo

_En desacuerdo

_Ni de acuerdo ni en desacuerdo

_De acuerdo

_Completamente de acuerdo

44. Con la adopción se adquieren los mismos compromisos y obligaciones que con un(a) hijo(a) biológico(a)

_Completamente en desacuerdo

_En desacuerdo

_Ni de acuerdo ni en desacuerdo

_De acuerdo

_Completamente de acuerdo

45. Si el proceso de adopción fuera menos complejo sería mi primera opción ante una situación de infertilidad

_Completamente en desacuerdo

_En desacuerdo

_Ni de acuerdo ni en desacuerdo

_De acuerdo

_Completamente de acuerdo

FIN DEL CUESTIONARIO
